1 **April 4, 2020:**

2 **A widely distributed hydrogenase oxidises**  
3 **atmospheric H<sub>2</sub> during bacterial growth**

4 **Zahra F. Islam<sup>1,2</sup>, Caitlin Welsh<sup>1,2</sup>, Katherine Bayly<sup>1,2</sup>, Rhys Grinter<sup>1,2</sup>, Gordon**  
5 **Southam<sup>3</sup>, Emma J. Gagen<sup>3</sup>, Chris Greening<sup>1,2\*</sup>**

6  
7 <sup>1</sup> School of Biological Sciences, Monash University, Clayton, VIC 3800, Australia

8 <sup>2</sup> Department of Microbiology, Biomedicine Discovery Institute, Clayton, VIC 3800,  
9 Australia

10 <sup>3</sup> School of Earth and Environmental Sciences, University of Queensland, St Lucia, QLD  
11 4072, Australia

12

13 \* Correspondence can be addressed to:

14

15 Assoc Prof Chris Greening ([chris.greening@monash.edu](mailto:chris.greening@monash.edu))

16

17

## 18 Abstract

19

20 Diverse aerobic bacteria persist by consuming atmospheric hydrogen (H<sub>2</sub>) using group  
21 1h [NiFe]-hydrogenases. However, other hydrogenase classes are also distributed in  
22 aerobes, including the group 2a [NiFe]-hydrogenase. Based on studies focused on  
23 Cyanobacteria, the reported physiological role of the group 2a [NiFe]-hydrogenase is to  
24 recycle H<sub>2</sub> produced by nitrogenase. However, given this hydrogenase is also present in  
25 various heterotrophs and lithoautotrophs lacking nitrogenases, it may play a wider role in  
26 bacterial metabolism. Here we investigated the role of this enzyme in three species from  
27 different phylogenetic lineages and ecological niches: *Acidithiobacillus ferrooxidans*  
28 (phylum Proteobacteria), *Chloroflexus aggregans* (phylum Chloroflexota), and  
29 *Gemmatimonas aurantiaca* (phylum Gemmatimonadota). qRT-PCR analysis revealed  
30 that the group 2a [NiFe]-hydrogenase of all three species is significantly upregulated  
31 during exponential growth compared to stationary phase, in contrast to the profile of the  
32 persistence-linked group 1h [NiFe]-hydrogenase. Whole-cell biochemical assays  
33 confirmed that all three strains aerobically respire H<sub>2</sub> to sub-atmospheric levels, and  
34 oxidation rates were much higher during growth. Moreover, the oxidation of H<sub>2</sub> supported  
35 mixotrophic growth of the carbon-fixing strains *C. aggregans* and *A. ferrooxidans*. Finally,  
36 we used phylogenomic analyses to show that this hydrogenase is widely distributed and  
37 is encoded by 13 bacterial phyla. These findings challenge the current persistence-centric  
38 model of the physiological role of atmospheric H<sub>2</sub> oxidation and extends this process to  
39 two more phyla, Proteobacteria and Gemmatimonadota. In turn, these findings have  
40 broader relevance for understanding how bacteria conserve energy in different  
41 environments and control the biogeochemical cycling of atmospheric trace gases.

## 42 Introduction

43

44 Aerobic bacteria mediate the biogeochemically and ecologically important process of  
45 atmospheric hydrogen (H<sub>2</sub>) oxidation [1]. Terrestrial bacteria constitute the largest sink  
46 of this gas and mediate the net consumption of approximately 70 million tonnes of  
47 atmospheric H<sub>2</sub> per year [2, 3]. The energy derived from this process appears to be  
48 critical for sustaining the productivity and biodiversity of ecosystems with low organic  
49 carbon inputs [4–9]. Atmospheric H<sub>2</sub> oxidation is thought to be primarily mediated by  
50 group 1h [NiFe]-hydrogenases, a specialised oxygen-tolerant, high-affinity class of  
51 hydrogenases [4, 10–13]. To date, aerobic heterotrophic bacteria from four distinct  
52 bacterial phyla, the Actinobacteriota [10, 12, 14, 15], Acidobacteriota [16, 17],  
53 Chloroflexota [18], and Verrucomicrobiota [19], have been experimentally shown to  
54 consume atmospheric H<sub>2</sub> using this enzyme. This process has been primarily linked  
55 to energy conservation during persistence. Reflecting this, the expression and activity  
56 of the group 1h hydrogenase is induced by carbon starvation across a wide range of  
57 species [10, 12, 18, 20–23]. Moreover, genetic deletion of hydrogenase structural  
58 genes results in impaired long-term survival of *Mycobacterium smegmatis* cells and  
59 *Streptomyces avermitilis* spores [20, 21, 24, 25].

60

61 Genomic and metagenomic surveys have suggested that other uptake hydrogenases  
62 are widely distributed among aerobic bacteria and potentially have a role in  
63 atmospheric H<sub>2</sub> uptake [4, 26]. These include the widely distributed group 2a [NiFe]-  
64 hydrogenases. This hydrogenase class has primarily been investigated in  
65 Cyanobacteria, where it is encoded by most diazotrophic strains; the enzyme recycles  
66 H<sub>2</sub> released as a by-product of the nitrogenase reaction and inputs the derived  
67 electrons into the respiratory chain [27–30]. However, according to HydDB, group 2a  
68 hydrogenases are also encoded by isolates from at least eight other phyla [26],  
69 spanning both obligate organoheterotrophs (e.g. *Mycobacterium*, *Runella*,  
70 *Gemmatimonas*) and obligate lithoautotrophs (e.g. *Acidithiobacillus*, *Nitrospira*,  
71 *Hydrogenobacter*) [12, 31, 32]. In *M. smegmatis*, this enzyme has a sufficiently high  
72 apparent affinity to oxidise H<sub>2</sub> even at sub-atmospheric levels [12, 23] and is maximally  
73 expressed during transitions between growth and persistence [23, 33]. In common  
74 with the group 1h hydrogenase also encoded by this bacterium, the group 2a

75 hydrogenase requires potential electron-relaying iron-sulfur proteins for activity [34]  
76 and is obligately linked to the aerobic respiratory chain [23]. However, it remains  
77 unclear if atmospheric H<sub>2</sub> oxidation by the group 2a hydrogenase reflects a general  
78 feature of the enzyme or instead is a specific adaptation of the mycobacterial  
79 respiratory chain.

80

81 In this study, we investigated whether group 2a [NiFe]-hydrogenases play a general  
82 role in atmospheric H<sub>2</sub> consumption. To do so, we studied this enzyme in three  
83 species, *Gemmatimonas aurantiaca*, *Acidithiobacillus ferrooxidans*, and *Chloroflexus*  
84 *aggregans*, that differ in their phylogenetic affiliation, ecological niches, and metabolic  
85 strategies. The obligate chemoorganoheterotroph *G. aurantiaca* (phylum  
86 Gemmatimonadota) was originally isolated from a wastewater treatment plant and to  
87 date has not been shown to utilise H<sub>2</sub> [35, 36]. The obligate chemolithoautotroph *A.*  
88 *ferrooxidans* (phylum Proteobacteria) was originally isolated from acidic coal mine  
89 effluent, and has been extensively studied for its energetic flexibility, including the  
90 ability to grow exclusively on H<sub>2</sub> [32, 37, 38]. The metabolically flexible *C. aggregans*  
91 (phylum Chloroflexota), a facultative chemolithoautotroph and anoxygenic  
92 photoheterotroph, was originally isolated from a Japanese hot spring and is capable  
93 of hydrogenotrophic growth [39–41]. The organisms differ in their carbon dioxide  
94 fixation pathways, with *A. ferrooxidans* mediating the Calvin-Benson cycle *via* two  
95 RuBisCO enzymes, *C. aggregans* encoding the 3-hydroxypropionate cycle [38, 42,  
96 43], and *G. aurantiaca* unable to fix carbon dioxide [35]. While all three species have  
97 previously been shown to encode group 2a [NiFe]-hydrogenases [4, 38], it is unknown  
98 whether they can oxidise atmospheric H<sub>2</sub> oxidation. To resolve this, we investigated  
99 the expression, activity, and role of this enzyme in axenic cultures of the three species.

100

## 101 **Materials and Methods**

102

### 103 **Bacterial growth conditions**

104 *Gemmatimonas aurantiaca* (DSM 14586), *Acidithiobacillus ferrooxidans* (DSM  
105 14882), and *Chloroflexus aggregans* (DSM 9486) were imported from DSMZ. All  
106 cultures were routinely aerobically maintained in 120 mL glass serum vials with treated  
107 lab-grade butyl rubber stoppers, unless otherwise stated. Broth cultures of *G.*  
108 *aurantiaca* were grown in 30 mL of NM1 media as previously described [44] and  
109 incubated at 30°C at an agitation speed of 180 rpm in a New Brunswick Scientific  
110 Excella E24 incubator. Cultures of *C. aggregans* were maintained  
111 chemoheterotrophically in 30 mL of 1/5 PE media, as previously described [39], and  
112 incubated at 55°C at an agitation speed of 150 rpm in an Eppendorf 40 Incubator in  
113 the dark. Cultures of *A. ferrooxidans* were maintained in 30 mL DSMZ medium 882  
114 supplemented with an additional 13 g L<sup>-1</sup> of FeSO<sub>4</sub>·7H<sub>2</sub>O (pH 1.2) and incubated at  
115 30°C at an agitation speed of 180 rpm in a New Brunswick Scientific Excella E24  
116 incubator. To assess whether bacterial growth was enhanced by the presence of H<sub>2</sub>  
117 for each species, ambient air headspaces were amended with either 1% or 10% H<sub>2</sub>  
118 (*via* 99.999% pure H<sub>2</sub> gas cylinder). Growth was monitored by determining the optical  
119 density (OD<sub>600</sub>) of periodically sampled 1 mL extracts using an Eppendorf  
120 BioSpectrophotometer.

121

### 122 **RNA extraction**

123 Triplicate 30 mL cultures of *G. aurantiaca*, *A. ferrooxidans* and *C. aggregans* were  
124 grown synchronously in 120 mL sealed serum vials. Whereas one set of triplicate  
125 cultures were grown in an ambient air headspace, another set was grown in an  
126 ambient air headspace supplemented with H<sub>2</sub> to a final concentration of 10% v/v (*via*  
127 a 99.999% pure H<sub>2</sub> cylinder). Cultures were grown to either exponential phase (OD<sub>600</sub>  
128 0.05 for *G. aurantiaca*; OD<sub>600</sub> 0.1 for *C. aggregans*; OD<sub>600</sub> 0.05 for *A. ferrooxidans*) or  
129 stationary phase (Day 10 for *G. aurantiaca*; Day 4 for *C. aggregans*; Day 14 for *A.*  
130 *ferrooxidans*). For *G. aurantiaca* and *C. aggregans*, cells were then quenched using a  
131 glycerol-saline solution (-20°C, 3:2 v/v), harvested by centrifugation (20,000 × *g*, 30  
132 min, -9°C), resuspended in 1 mL cold 1:1 glycerol:saline solution (-20°C), and further  
133 centrifuged (20,000 × *g*, 30 min, -9°C). Briefly, resultant cell pellets were resuspended

134 in 1 mL TRIzol Reagent (Thermo Fisher Scientific), mixed with 0.1 mm zircon beads  
135 (0.3 g), and subject to beat-beating (five cycles, 4000 rpm, 30 s) in a Mini-Beadbeater  
136 96 (Biospec) prior to centrifugation (12,000 × *g*, 10 min, 4°C). Total RNA was extracted  
137 using the phenol-chloroform method as per manufacturer's instructions (TRIzol  
138 Reagent User Guide, Thermo Fisher Scientific) and resuspended in  
139 diethylpyrocarbonate (DEPC)-treated water. RNA was treated using the TURBO DNA-  
140 free kit (Thermo Fisher Scientific) as per manufacturer's instructions. RNA from *A.*  
141 *ferrooxidans* was extracted using a previously described extraction method optimised  
142 for acid mine drainage microorganisms [45]. RNA concentration and purity were  
143 confirmed using a NanoDrop ND-1000 spectrophotometer.

144

### 145 **Quantitative RT-PCR**

146 Quantitative reverse transcription PCR (qRT-PCR) was used to determine the  
147 expression profile of all hydrogenase genes present in each species during different  
148 growth phases with and without supplemental H<sub>2</sub>. cDNA was synthesised using a  
149 SuperScript III First-Strand Synthesis System kit for qRT-PCR (Thermo Fisher  
150 Scientific) with random hexamer primers, as per manufacturer's instructions. For all  
151 three species, the catalytic subunit gene of the group 2a [NiFe]-hydrogenase (*hucL*)  
152 was targeted. In addition, the catalytic subunits of the additional [NiFe]-hydrogenases  
153 of *C. aggregans* (group 3d, *hoxH*) and *A. ferrooxidans* (group 1e, *hyiB*; group 3b, *hyhL*)  
154 were also targeted. Quantitative RT-PCR was performed using a LightCycler 480  
155 SYBR Green I Master Mix (Roche) as per manufacturer's instructions in 96-well plates  
156 and conducted in a LightCycler 480 Instrument II (Roche). Primers used in the study  
157 (**Table S1**) were designed using Primer3 [46]. Hydrogenase expression data was  
158 normalised to housekeeping genes for each species (16S rRNA gene for *G. aurantiaca*  
159 and *C. aggregans*; DNA-directed RNA polymerase subunit beta gene *rpoC* for *A.*  
160 *ferrooxidans*). Threshold cycle values (C<sub>T</sub>) were normalised to the expression of the  
161 housekeeping gene in exponential phase under ambient air conditions. All biological  
162 triplicate samples, standards, and negative controls were run in technical duplicate.

163

### 164 **Gas chromatography**

165 Gas chromatography measurements were used to determine the capacity of the three  
166 species to use sub-atmospheric concentrations of H<sub>2</sub>. Briefly, biological triplicate  
167 exponential phase or stationary phase cultures of each species were opened,

168 equilibrated with ambient air (1 h), and resealed. These re-aerated vials were then  
169 amended with H<sub>2</sub> (*via* 1% v/v H<sub>2</sub> in N<sub>2</sub> gas cylinder, 99.999% pure) to achieve final  
170 headspace concentrations of ~10 ppmv. Headspace mixing ratios were measured  
171 immediately after closure and at regular intervals thereafter until the limit of  
172 quantification of the gas chromatograph was reached (42 ppbv H<sub>2</sub>). For quantification,  
173 2 mL headspace samples were measured using a pulsed discharge helium ionisation  
174 detector (model TGA-6791-W-4U-2, Valco Instruments Company Inc.) calibrated  
175 against ultra-pure H<sub>2</sub> gas standards of known concentrations as described previously  
176 [18]. The vials for each species were maintained at their respective growth  
177 temperatures and agitation speeds for the entire incubation period to facilitate H<sub>2</sub> and  
178 O<sub>2</sub> transfer between the headspace and the culture. Concurrently, headspace mixing  
179 ratios from media-only negative controls (30 mL of media for each species) were  
180 measured to confirm that observed decreases in gas concentrations were biological  
181 in nature. First order rate constants (*k* values) for exponential and stationary phase H<sub>2</sub>  
182 consumption were determined using the exponential function in GraphPad Prism  
183 (version 8.0.2).

184

### 185 **Phylogenetic analysis**

186 A phylogenetic tree was constructed to investigate the distribution and evolutionary  
187 history of group 2a [NiFe]-hydrogenases across bacterial phyla. Amino acid  
188 sequences of the catalytic subunit of the group 2a [NiFe]-hydrogenase (HucL) and  
189 related enzymes were retrieved from the National Center for Biotechnology  
190 Information (NCBI) Reference Sequence (RefSeq) database by protein BLAST in  
191 February 2020. The resultant sequences were then classified using HydDB [26], with  
192 sequences matching group 2a [NiFe]-hydrogenases retained and any duplicate and  
193 multispecies sequences removed. The 207 amino acid sequences representative of  
194 genus-level diversity were aligned with reference sequences using Clustal W in MEGA  
195 X [47]. Evolutionary relationships were visualised by constructing a maximum-  
196 likelihood phylogenetic tree, with Neighbour-Join and BioNJ algorithms applied to a  
197 matrix of pairwise distances that were estimated using a JTT model and topology  
198 selected by superior log-likelihood value. Gaps were treated with partial deletion, the  
199 tree was bootstrapped with 500 replicates, and the tree was midpoint rooted.  
200 Sequences used in this analysis are listed in **Table S2**. Additionally, 20 annotated  
201 reference genomes (representative of order-level diversity) were retrieved from the

202 NCBI GenBank database and manually analysed for putative group 2a [NiFe]-  
203 hydrogenase gene clusters. The web-based software ProPeron  
204 ([doi.org/10.5281/zenodo.3519494](https://doi.org/10.5281/zenodo.3519494)) was used to generate to-scale gene organisation  
205 diagrams of these group 2a [NiFe]-hydrogenases.

206



## 207 Results

208

### 209 The expression profile of group 2a [NiFe]-hydrogenases is antithetical to group 210 1h [NiFe]-hydrogenases

211

212 We used qRT-PCR to quantify the expression of the large subunit of the group 2a  
213 [NiFe]-hydrogenase (*hucL*). The gene was expressed at moderate to high levels in all  
214 three strains during aerobic growth on preferred energy sources (organic carbon for  
215 *G. aurantiaca* and *C. aggregans*, ferrous iron for *A. ferrooxidans*) (**Fig. 1**). Expression  
216 levels did not significantly differ between strains grown in an ambient air headspace  
217 containing atmospheric H<sub>2</sub> or supplemented with 10% H<sub>2</sub> (**Fig. 1**). This suggests  
218 hydrogenase expression is constitutive and occurs even when atmospheric  
219 concentrations of the substrate are available.

220

221 Across all three strains, hydrogenase expression significantly decreased during the  
222 transition from growth to persistence. For *G. aurantiaca*, high expression was  
223 observed during exponential phase under both H<sub>2</sub>-supplemented and H<sub>2</sub>-unamended  
224 conditions (av.  $8.4 \times 10^6$  copies per g<sub>dw</sub>) and decreased 51-fold during stationary  
225 phase (av.  $1.6 \times 10^5$  copies g<sub>dw</sub><sup>-1</sup>;  $p = 0.012$ ) (**Fig. 1a**). Hydrogenase expression of *A.*  
226 *ferrooxidans* was moderate during growth (av.  $1.8 \times 10^6$  copies per g<sub>dw</sub>) and dropped  
227 3.9-fold in stationary phase cultures (av.  $4.5 \times 10^5$  copies per g<sub>dw</sub>;  $p = 0.013$ ) (**Fig.**  
228 **1b**), whereas expression in *C. aggregans* was very high during exponential growth  
229 (av.  $2.9 \times 10^9$  copies g<sub>dw</sub><sup>-1</sup>) and fell 15,000-fold during persistence (av.  $1.9 \times 10^5$  copies  
230 g<sub>dw</sub><sup>-1</sup>; 0.003) (**Fig. 1c**). Overall, while expression levels greatly vary between species,  
231 these results clearly show the group 2a [NiFe]-hydrogenase is expressed primarily in  
232 growing cells. These expression profiles contrast with the group 1h [NiFe]-  
233 hydrogenase, which is induced during long-term persistence in a range of species [10,  
234 18, 20–23].

235

### 236 Group 2a [NiFe]-hydrogenases oxidise H<sub>2</sub> to sub-atmospheric levels

237

238 Hydrogenase activity of the three strains was inferred from monitoring changes in  
239 headspace H<sub>2</sub> mixing ratios over time by gas chromatography. In line with the

240 expression profiles (**Fig. 1**), we observed that all three strains oxidised atmospheric  
241 H<sub>2</sub> during growth in an ambient air headspace (**Fig. S1**). These observations extend  
242 the trait of trace gas scavenging to three more species and suggest that group 2a  
243 [NiFe]-hydrogenases broadly have the capacity to oxidise H<sub>2</sub> at atmospheric levels.

244

245 We subsequently monitored the consumption of H<sub>2</sub> by exponential and stationary  
246 phase cultures in ambient air supplemented with 10 ppmv H<sub>2</sub>. For *G. aurantiaca* and  
247 *A. ferrooxidans*, H<sub>2</sub> was oxidised to sub-atmospheric levels under both conditions in  
248 an apparent first-order kinetic process (**Fig. 2a & 2b**). However, biomass-normalised  
249 first-order rate constants were higher in exponential than stationary phase cells by 23-  
250 fold ( $p = 0.0029$ ) and 120-fold ( $p < 0.0001$ ) respectively (**Fig. 2d**). For *C. aggregans*,  
251 H<sub>2</sub> was oxidised at rapid rates in exponentially growing cells, but occurred at extremely  
252 slow rates in stationary cells (**Fig. 2c & 2d**). These observations support the qRT-PCR  
253 results by showing hydrogenase activity predominantly occurs during growth. It should  
254 be noted that additional [NiFe]-hydrogenases are encoded by both *C. aggregans*  
255 (group 3d) and *A. ferrooxidans* (group 1e and 3b). The additional hydrogenases are  
256 expressed at tenfold lower levels for *C. aggregans*, but at similar levels for *A.*  
257 *ferrooxidans*, and hence may contribute to H<sub>2</sub> uptake (**Fig. S2**). It is nevertheless likely  
258 that the group 2a [NiFe]-hydrogenases mediate atmospheric H<sub>2</sub> uptake given (i) the  
259 H<sub>2</sub> uptake activities of *C. aggregans* and *A. ferrooxidans* mimic that of *G. aurantiaca*,  
260 which lacks additional hydrogenases; (ii) previous genetic studies show group 2a  
261 enzymes mediate high-affinity aerobic H<sub>2</sub> uptake in mycobacteria [12, 23]; and (iii)  
262 group 1e and 3b/3d enzymes are likely incapable of atmospheric H<sub>2</sub> oxidation given  
263 their respective characterised roles in anaerobic respiration and fermentation [26].

264

## 265 H<sub>2</sub> consumption enhances mixotrophic growth in carbon-fixing strains

266

267 The observation that expression and activity of the group 2a [NiFe]-hydrogenase is  
268 optimal during growth suggests this enzyme supports mixotrophic growth. To test this,  
269 we monitored growth by optical density of the three strains in headspaces containing  
270 H<sub>2</sub> at either ambient, 1%, or 10% mixing ratios. No growth differences in the obligate  
271 heterotroph *G. aurantiaca* were observed between the conditions ( $p = 0.30$ ) (**Fig. 3a**).  
272 In contrast, H<sub>2</sub>-dependent growth stimulation was observed for the obligate autotroph  
273 *A. ferrooxidans* (1.4-fold increase;  $p = 0.0003$ ) (**Fig. 3b**) and facultative autotroph *C.*

274 *aurantiaca* (1.2-fold increase;  $p = 0.029$ ) (**Fig. 3c**). This suggests that reductant  
275 derived from H<sub>2</sub> oxidation can be used by these bacteria to fix CO<sub>2</sub> through the Calvin-  
276 Benson and 3-hydroxypropionate cycles, respectively.

277

### 278 **Hydrogenases with common phylogeny and genetic organisation are widely** 279 **distributed across 13 bacterial phyla**

280

281 Finally, we surveyed the distribution of group 2a [NiFe]-hydrogenases to infer which  
282 other bacteria may oxidise atmospheric H<sub>2</sub>. We detected the large subunit of this  
283 hydrogenase (HucL) across 171 genera and 13 phyla (**Table S2; Fig. S3**); this  
284 constitutes a 3.2-fold increase in the number of genera and 1.4-fold increase in the  
285 number of phyla reported to encode this enzyme [4, 26]. The HucL-encoding bacteria  
286 include various known hydrogenotrophic aerobes, such as *Nitrospira moscoviensis*  
287 (Nitrospirota) [31], *Hydrogenobacter thermophilus* (Aquificota) [48], *Kyrpidia tusciae*  
288 (Firmicutes) [49], *Sulfobacillus acidophilus* (Firmicutes) [50], and *Pseudonocardia*  
289 *dioxanivorans* (Actinobacteriota) [51], suggesting these strains may also consume  
290 atmospheric H<sub>2</sub>. The hydrogenase was also distributed in various lineages of  
291 Bacteroidota, Alphaproteobacteria, Gammaproteobacteria, and Deinococcota for  
292 which H<sub>2</sub> oxidation has not, to our knowledge, been reported.

293

294 A maximum-likelihood phylogenetic tree showed the retrieved HucL sequences form  
295 a well-supported monophyletic clade. Most sequences clustered into four major  
296 radiations, Bacteroidota-associated, Cyanobacteria-associated, Proteobacteria-  
297 associated (including *A. ferrooxidans*), and a mixed clade containing sequences from  
298 seven phyla (including *G. aurantiaca* and *C. aggregans*) (**Fig. 4**). Several genes were  
299 commonly genomically associated with *hucL* genes in putative operons, including the  
300 hydrogenase small subunit (*hucS*), a Rieske-type iron-sulfur protein (*hucE*) [34],  
301 hypothetical proteins (including NHL-repeat proteins) [33], and various maturation  
302 factors (**Fig. S4**). The group 2a [NiFe]-hydrogenases are distinct in both phylogeny  
303 and genetic organisation to the two most closely related hydrogenase subgroups, the  
304 previously described group 2e [NiFe]-hydrogenases of aerobic hydrogenotrophic  
305 Crenarchaeota [26, 52] and the novel group 2f [NiFe]-hydrogenases that are  
306 distributed sporadically in bacteria and archaea (**Fig. 4**).

## 307 Discussion

308

309 Overall, these findings overturn the paradigm that atmospheric H<sub>2</sub> oxidation is primarily  
310 a persistence-linked trait. We infer that group 2a [NiFe]-hydrogenases are optimally  
311 expressed and active during exponential phase, consume H<sub>2</sub> at sub-atmospheric  
312 concentrations, and support mixotrophic growth. Largely concordant findings were  
313 made in three phylogenetically, physiologically, and ecologically distinct bacterial  
314 species. These findings contrast with multiple pure culture studies that have linked  
315 expression, activity, and phenotypes associated with group 1h [NiFe]-hydrogenases  
316 to survival rather than growth [10, 12, 18, 20, 22, 24, 25]. However, a growth-  
317 supporting role of atmospheric H<sub>2</sub> oxidation is nevertheless consistent with several  
318 surprising recent reports: the measurement of atmospheric H<sub>2</sub> oxidation during growth  
319 of several strains [12, 19, 24, 53]; the discovery of an Antarctic desert community  
320 driven by trace gas oxidation [9]; and the isolation of a proteobacterial methanotroph  
321 thought to grow on air alone [54]. Together, these findings suggest that the current  
322 persistence-centric model of atmospheric H<sub>2</sub> utilisation is overly generalised and that  
323 this process also supports growth.

324

325 Atmospheric H<sub>2</sub> oxidation during growth is likely to primarily benefit bacteria that adopt  
326 a mixotrophic lifestyle. While atmospheric H<sub>2</sub> alone can sustain bacterial maintenance,  
327 theoretical modelling suggests this energy source is insufficiently concentrated to  
328 permit growth as the sole energy source [1, 55]. Instead, bacteria that co-oxidise this  
329 dependable gas with other organic or inorganic energy sources may have significant  
330 selective advantages, especially in environments where resource availability is very  
331 low or variable. Likewise, it is probable that many bacteria in natural environments  
332 supplement growth by taking advantage of transient increases in H<sub>2</sub> availability. For  
333 example, the metabolic generalist *C. aggregans* may facilitate its expansion in  
334 geothermal mats by simultaneously utilising geothermal and atmospheric sources of  
335 H<sub>2</sub>, in addition to sunlight and organic compounds [39, 40, 56]. Similarly, in the  
336 dynamic environment of wastewater treatment plants, *G. aurantiaca* may be well-  
337 suited to take advantage of fermentatively-produced H<sub>2</sub> released during transitions  
338 between oxic and anoxic states [36, 57].

339

340 The ability to consume atmospheric H<sub>2</sub> may also be particularly advantageous during  
341 early stages of ecological succession. Indeed, *A. ferrooxidans* may initially rely on this  
342 atmospheric energy source as it colonises barren tailings and establishes an acidic  
343 microenvironment conducive for iron oxidation [58]. Hydrogen synthesis in tailings can  
344 further benefit *A. ferrooxidans* as acid conditions and more complex bacterial consortia  
345 develop. Specifically, acetate-dependent growth of dissimilatory sulfate reducing  
346 bacteria in tailings [59] will initiate endogenous geochemical production of trace  
347 hydrogen ( $\text{FeS} + \text{H}_2\text{S} \rightarrow \text{FeS}_2 + \text{H}_2$ ). As tailings cycle between aerobic (vadose) and  
348 anaerobic (water-saturating) conditions, the H<sub>2</sub> available from atmospheric and  
349 geochemical sources respectively may provide a continuous energy source for *A.*  
350 *ferrooxidans*. In addition, any environments possessing sulfate and iron, i.e.,  
351 'downstream' from acid-generating ecosystems (including marine sediments), can  
352 generate hydrogen via bacterial sulfate reduction.

353

354 This study also identifies key microbial and enzymatic players in the global hydrogen  
355 cycle. The group 2a [NiFe]-hydrogenase is the second hydrogenase lineage shown to  
356 have a role in atmospheric H<sub>2</sub> oxidation across multiple bacterial phyla. The group 1h  
357 enzyme is probably the main sink of the H<sub>2</sub> cycle given it is the predominant  
358 hydrogenase in most soils [4, 11, 60]. However, the group 2a enzyme is moderately  
359 to highly abundant in many soil, marine, and geothermal environments [60], among  
360 others, and hence is also likely to be a key regulator of H<sub>2</sub> fluxes. This study also  
361 reports atmospheric H<sub>2</sub> oxidation for the first time in two globally dominant phyla,  
362 Proteobacteria and Gemmatimonadota, and uncovers *A. ferrooxidans* as the first H<sub>2</sub>-  
363 scavenging autotroph. Until recently, atmospheric H<sub>2</sub> oxidation was thought to be  
364 primarily mediated by heterotrophic Actinobacteriota [1, 10–12], but it is increasingly  
365 apparent that multiple aerobic lineages are responsible [4, 17–19, 22, 34]. Some six  
366 phyla have now been described that are capable of atmospheric H<sub>2</sub> oxidation and,  
367 given the group 2a [NiFe]-hydrogenase is encoded by at least eight other phyla, others  
368 will likely soon be described. It is possible that atmospheric H<sub>2</sub> oxidation extends to  
369 other important groups, such as nitrite-oxidising Nitrospirota [31], methane-oxidising  
370 Proteobacteria [54], and potentially even oxygenic phototrophs; while Cyanobacteria  
371 are known to recycle endogenously-produced H<sub>2</sub> [27, 62, 63], it should be tested  
372 whether they can also scavenge exogenous H<sub>2</sub>. Indeed, while atmospheric H<sub>2</sub>

373 oxidisers were only recently discovered [10, 14, 64], it is now plausible that these  
374 bacteria may represent the rule rather than the exception among aerobic H<sub>2</sub> oxidisers.

375 **Footnotes**

376

377 **Acknowledgements**

378 This work was supported by an ARC DECRA Fellowship (DE170100310; awarded to  
379 C.G.), an ARC Discovery Grant (DP200103074; awarded to C.G. and R.G.), an  
380 NHMRC EL2 Fellowship (APP1178715; salary for C.G.), and Australian Government  
381 Research Training Program Stipend Scholarships (awarded to Z.F.I. and K.B.).

382

383 **Author contributions**

384 C.G. and Z.F.I. conceived this study. C.G., Z.F.I., and R.G. supervised this study. C.G.,  
385 Z.F.I., and C.W. designed experiments. Z.F.I., C.W., and K.B. performed experiments.  
386 Z.F.I., C.W., and C.G. analysed data. E.J.G. and G.S. contributed to study conception  
387 and experimental development. Z.F.I., C.G., and C.W. wrote the paper with input from  
388 all authors.

389

390 **Conflict of interest statement**

391 The authors declare no conflicts of interest.

## 392 References

393

- 394 1. Greening C, Constant P, Hards K, Morales SE, Oakeshott JG, Russell RJ, et  
395 al. Atmospheric hydrogen scavenging: from enzymes to ecosystems. *Appl*  
396 *Environ Microbiol* 2015; **81**: 1190–1199.
- 397 2. Ehhalt DH, Rohrer F. The tropospheric cycle of H<sub>2</sub>: a critical review. *Tellus B*  
398 2009; **61**: 500–535.
- 399 3. Constant P, Poissant L, Villemur R. Tropospheric H<sub>2</sub> budget and the response  
400 of its soil uptake under the changing environment. *Sci Total Environ* 2009; **407**:  
401 1809–1823.
- 402 4. Greening C, Biswas A, Carere CR, Jackson CJ, Taylor MC, Stott MB, et al.  
403 Genomic and metagenomic surveys of hydrogenase distribution indicate H<sub>2</sub> is  
404 a widely utilised energy source for microbial growth and survival. *ISME J* 2016;  
405 **10**: 761–777.
- 406 5. Kanno M, Constant P, Tamaki H, Kamagata Y. Detection and isolation of  
407 plant-associated bacteria scavenging atmospheric molecular hydrogen.  
408 *Environ Microbiol* 2015; **18**: 2495–2506.
- 409 6. Kessler AJ, Chen Y-J, Waite DW, Hutchinson T, Koh S, Popa ME, et al.  
410 Bacterial fermentation and respiration processes are uncoupled in permeable  
411 sediments. *Nat Microbiol* 2019; **4**: 1014–1023.
- 412 7. Khdhiri M, Hesse L, Popa ME, Quiza L, Lalonde I, Meredith LK, et al. Soil  
413 carbon content and relative abundance of high affinity H<sub>2</sub>-oxidizing bacteria  
414 predict atmospheric H<sub>2</sub> soil uptake activity better than soil microbial community  
415 composition. *Soil Biol Biochem* 2015; **85**: 1–9.
- 416 8. Lynch RC, Darcy JL, Kane NC, Nemergut DR, Schmidt SK. Metagenomic  
417 evidence for metabolism of trace atmospheric gases by high-elevation desert  
418 Actinobacteria. *Front Microbiol* 2014; **5**: 698.
- 419 9. Ji M, Greening C, Vanwonterghem I, Carere CR, Bay SK, Steen JA, et al.  
420 Atmospheric trace gases support primary production in Antarctic desert  
421 surface soil. *Nature* 2017; **552**: 400–403.
- 422 10. Constant P, Chowdhury SP, Pratscher J, Conrad R. Streptomycetes  
423 contributing to atmospheric molecular hydrogen soil uptake are widespread  
424 and encode a putative high-affinity [NiFe]-hydrogenase. *Environ Microbiol*  
425 2010; **12**: 821–829.
- 426 11. Constant P, Chowdhury SP, Hesse L, Pratscher J, Conrad R. Genome data  
427 mining and soil survey for the novel Group 5 [NiFe]-hydrogenase to explore  
428 the diversity and ecological importance of presumptive high-affinity H<sub>2</sub>-  
429 oxidizing bacteria. *Appl Environ Microbiol* 2011; **77**: 6027–6035.
- 430 12. Greening C, Berney M, Hards K, Cook GM, Conrad R. A soil actinobacterium  
431 scavenges atmospheric H<sub>2</sub> using two membrane-associated, oxygen-  
432 dependent [NiFe] hydrogenases. *Proc Natl Acad Sci U S A* 2014; **111**: 4257–  
433 4261.



- 434 13. Schäfer C, Friedrich B, Lenz O. Novel, oxygen-insensitive group 5 [NiFe]-  
435 hydrogenase in *Ralstonia eutropha*. *Appl Environ Microbiol* 2013; **79**: 5137–45.
- 436 14. Constant P, Poissant L, Villemur R. Isolation of *Streptomyces* sp. PCB7, the  
437 first microorganism demonstrating high-affinity uptake of tropospheric H<sub>2</sub>.  
438 *ISME J* 2008; **2**: 1066–1076.
- 439 15. Meredith LK, Rao D, Bosak T, Klepac-Ceraj V, Tada KR, Hansel CM, et al.  
440 Consumption of atmospheric hydrogen during the life cycle of soil-dwelling  
441 actinobacteria. *Environ Microbiol Rep* 2014; **6**: 226–38.
- 442 16. Greening C, Carere CR, Rushton-Green R, Harold LK, Hards K, Taylor MC, et  
443 al. Persistence of the dominant soil phylum *Acidobacteria* by trace gas  
444 scavenging. *Proc Natl Acad Sci USA* 2015; **112**: 10497–10502.
- 445 17. Myers MR, King GM. Isolation and characterization of *Acidobacterium ailaui*  
446 sp. nov., a novel member of Acidobacteria subdivision 1, from a geothermally  
447 heated Hawaiian microbial mat. *Int J Syst Evol Microbiol* 2016; **66**: 5328–5335.
- 448 18. Islam ZF, Cordero PRF, Feng J, Chen Y-J, Bay S, Gleadow RM, et al. Two  
449 Chloroflexi classes independently evolved the ability to persist on atmospheric  
450 hydrogen and carbon monoxide. *ISME J* 2019; **13**: 1801–1813.
- 451 19. Schmitz RA, Pol A, Mohammadi SS, Hogendoorn C, van Gelder AH, Jetten  
452 MSM, et al. The thermoacidophilic methanotroph *Methylacidiphilum*  
453 *fumariolicum* SolV oxidizes subatmospheric H<sub>2</sub> with a high-affinity, membrane-  
454 associated [NiFe] hydrogenase. *ISME J* 2020; 1–10.
- 455 20. Berney M, Cook GM. Unique flexibility in energy metabolism allows  
456 mycobacteria to combat starvation and hypoxia. *PLoS One* 2010; **5**: e8614.
- 457 21. Berney M, Greening C, Conrad R, Jacobs WR, Cook GM. An obligately  
458 aerobic soil bacterium activates fermentative hydrogen production to survive  
459 reductive stress during hypoxia. *Proc Natl Acad Sci U S A* 2014; **111**: 11479–  
460 11484.
- 461 22. Greening C, Carere CR, Rushton-Green R, Harold LK, Hards K, Taylor MC, et  
462 al. Persistence of the dominant soil phylum *Acidobacteria* by trace gas  
463 scavenging. *Proc Natl Acad Sci U S A* 2015; **112**: 10497–10502.
- 464 23. Cordero PRF, Grinter R, Hards K, Cryle MJ, Warr CG, Cook GM, et al. Two  
465 uptake hydrogenases differentially interact with the aerobic respiratory chain  
466 during mycobacterial growth and persistence. *J Biol Chem* 2019;  
467 10.1074/jbc.RA119.011076.
- 468 24. Greening C, Villas-Bôas SG, Robson JR, Berney M, Cook GM. The growth  
469 and survival of *Mycobacterium smegmatis* is enhanced by co-metabolism of  
470 atmospheric H<sub>2</sub>. *PLoS One* 2014; **9**: e103034.
- 471 25. Liot Q, Constant P. Breathing air to save energy – new insights into the  
472 ecophysiological role of high-affinity [NiFe]-hydrogenase in *Streptomyces*  
473 *avermitilis*. *Microbiologyopen* 2016; **5**: 47–59.
- 474 26. Søndergaard D, Pedersen CNS, Greening C. HydDB: a web tool for  
475 hydrogenase classification and analysis. *Sci Rep* 2016; **6**: 34212.

- 476 27. Papen H, Kentemich T, Schmülling T, Bothe H. Hydrogenase activities in  
477 cyanobacteria. *Biochimie* 1986; **68**: 121–132.
- 478 28. Houchins JP, Burris RH. Occurrence and localization of two distinct  
479 hydrogenases in the heterocystous cyanobacterium *Anabaena* sp. strain 7120.  
480 *J Bacteriol* 1981; **146**: 209–214.
- 481 29. Tamagnini P, Axelsson R, Lindberg P, Oxelfelt F, Wünschiers R, Lindblad P.  
482 Hydrogenases and hydrogen metabolism of cyanobacteria. *Microbiol Mol Biol*  
483 *Rev* 2002; **66**: 1–20.
- 484 30. Bothe H, Schmitz O, Yates MG, Newton WE. Nitrogen fixation and hydrogen  
485 metabolism in cyanobacteria. *Microbiol Mol Biol Rev* 2010; **74**: 529–551.
- 486 31. Koch H, Galushko A, Albertsen M, Schintlmeister A, Gruber-Dorninger C,  
487 Lucker S, et al. Growth of nitrite-oxidizing bacteria by aerobic hydrogen  
488 oxidation. *Science* 2014; **345**: 1052–1054.
- 489 32. Drobner E, Huber H, Stetter KO. *Thiobacillus ferrooxidans*, a facultative  
490 hydrogen oxidizer. *Appl Environ Microbiol* 1990; **56**: 2922–2923.
- 491 33. Berney M, Greening C, Hards K, Collins D, Cook GM. Three different [NiFe]  
492 hydrogenases confer metabolic flexibility in the obligate aerobe *Mycobacterium*  
493 *smegmatis*. *Environ Microbiol* 2014; **16**: 318–330.
- 494 34. Islam ZF, Cordero PRF, Greening C. Putative iron-sulfur proteins are required  
495 for hydrogen consumption and enhance survival of mycobacteria. *Front*  
496 *Microbiol* 2019; **10**: 2749.
- 497 35. Taylor SW, Fahy E, Zhang B, Glenn GM, Warnock DE, Wiley S, et al.  
498 Characterization of the human heart mitochondrial proteome. *Nat Biotechnol*  
499 2003; **21**: 281–286.
- 500 36. Park D, Kim H, Yoon S. Nitrous oxide reduction by an obligate aerobic  
501 bacterium, *Gemmatimonas aurantiaca* strain T-27. *Appl Environ Microbiol*  
502 2017; **83**: e00502-17.
- 503 37. Razzell WE, Trussell PC. Isolation and properties of an iron-oxidizing  
504 *Thiobacillus*. *J Bacteriol* 1963; **85**: 595–603.
- 505 38. Valdés J, Pedroso I, Quatrini R, Dodson RJ, Tettelin H, Blake R, et al.  
506 *Acidithiobacillus ferrooxidans* metabolism: from genome sequence to industrial  
507 applications. *BMC Genomics* 2008; **9**: 597.
- 508 39. Hanada S, Hiraishi A, Shimada K, Matsuura K. *Chloroflexus aggregans* sp.  
509 nov., a filamentous phototrophic bacterium which forms dense cell aggregates  
510 by active gliding movement. *Int J Syst Evol Microbiol* 1995; **45**: 676–681.
- 511 40. Otaki H, Everroad RC, Matsuura K, Haruta S. Production and consumption of  
512 hydrogen in hot spring microbial mats dominated by a filamentous anoxygenic  
513 photosynthetic bacterium. *Microbes Environ* 2009; 1203190370.
- 514 41. Kawai S, Nishihara A, Matsuura K, Haruta S. Hydrogen-dependent autotrophic  
515 growth in phototrophic and chemolithotrophic cultures of thermophilic bacteria,  
516 *Chloroflexus aggregans* and *Chloroflexus aurantiacus*, isolated from Nakabusa  
517 hot springs. *FEMS Microbiol Lett* 2019; **366**: fnz122.

- 518 42. Heinhorst S, Baker SH, Johnson DR, Davies PS, Cannon GC, Shively JM.  
519 Two copies of form I RuBisCO genes in *Acidithiobacillus ferrooxidans* ATCC  
520 23270. *Curr Microbiol* 2002; **45**: 115–117.
- 521 43. Klatt CG, Bryant DA, Ward DM. Comparative genomics provides evidence for  
522 the 3-hydroxypropionate autotrophic pathway in filamentous anoxygenic  
523 phototrophic bacteria and in hot spring microbial mats. *Environ Microbiol* 2007;  
524 **9**: 2067–2078.
- 525 44. Zhang H, Sekiguchi Y, Hanada S, Hugenholtz P, Kim H, Kamagata Y, et al.  
526 *Gemmatimonas aurantiaca* gen. nov., sp. nov., a Gram-negative, aerobic,  
527 polyphosphate-accumulating micro-organism, the first cultured representative  
528 of the new bacterial phylum Gemmatimonadetes phyl. nov. *Int J Syst Evol*  
529 *Microbiol* 2003; **53**: 1155–1163.
- 530 45. Zammit CM, Mutch LA, Watling HR, Watkin ELJ. The recovery of nucleic acid  
531 from biomining and acid mine drainage microorganisms. *Hydrometallurgy*  
532 2011; **108**: 87–92.
- 533 46. Untergasser A, Cutcutache I, Koressaar T, Ye J, Faircloth BC, Remm M, et al.  
534 Primer3—new capabilities and interfaces. *Nucleic Acids Res* 2012; **40**: e115–  
535 e115.
- 536 47. Kumar S, Stecher G, Li M, Knyaz C, Tamura K. MEGA X: molecular  
537 evolutionary genetics analysis across computing platforms. *Mol Biol Evol* 2018;  
538 **35**: 1547–1549.
- 539 48. Kawasumi T, Igarashi Y, Kodama T, Minoda Y. *Hydrogenobacter thermophilus*  
540 gen. nov., sp. nov., an extremely thermophilic, aerobic, hydrogen-oxidizing  
541 bacterium. *Int J Syst Evol Microbiol* 1984; **34**: 5–10.
- 542 49. Klenk H-P, Lapidus A, Chertkov O, Copeland A, Del Rio TG, Nolan M, et al.  
543 Complete genome sequence of the thermophilic, hydrogen-oxidizing *Bacillus*  
544 *tusciae* type strain (T2 T) and reclassification in the new genus, *Kyrpidia* gen.  
545 nov. as *Kyrpidia tusciae* comb. nov. and emendation of the family  
546 Alicyclobacilla. *Stand Genomic Sci* 2011; **5**: 121.
- 547 50. Hedrich S, Johnson DB. Aerobic and anaerobic oxidation of hydrogen by  
548 acidophilic bacteria. *FEMS Microbiol Lett* . 2013. England. , **349**: 40–45
- 549 51. Grostern A, Alvarez-Cohen L. RubisCO-based CO<sub>2</sub> fixation and C1  
550 metabolism in the actinobacterium *Pseudonocardia dioxanivorans* CB1190.  
551 *Environ Microbiol* 2013; **15**: 3040–3053.
- 552 52. Auernik KS, Kelly RM. Physiological versatility of the extremely  
553 thermoacidophilic archaeon *Metallosphaera sedula* supported by  
554 transcriptomic analysis of heterotrophic, autotrophic, and mixotrophic growth.  
555 *Appl Environ Microbiol* 2010; **76**: 931–935.
- 556 53. Mohammadi S, Pol A, van Alen TA, Jetten MSM, Op den Camp HJM.  
557 *Methylacidiphilum fumariolicum* SolV, a thermoacidophilic ‘Knallgas’  
558 methanotroph with both an oxygen-sensitive and -insensitive hydrogenase.  
559 *ISME J* 2017; **11**: 945–958.
- 560 54. Tveit AT, Hestnes AG, Robinson SL, Schintlmeister A, Dedysh SN, Jehmlich

- 561 N, et al. Widespread soil bacterium that oxidizes atmospheric methane. *Proc*  
562 *Natl Acad Sci USA* 2019; **116**: 8515–8524.
- 563 55. Conrad R. Soil microorganisms oxidizing atmospheric trace gases (CH<sub>4</sub>, CO,  
564 H<sub>2</sub>, NO). *Indian J Microbiol* 1999; **39**: 193–203.
- 565 56. Spear JR, Walker JJ, McCollom TM, Pace NR. Hydrogen and bioenergetics in  
566 the Yellowstone geothermal ecosystem. *Proc Natl Acad Sci USA* 2005; **102**:  
567 2555–2560.
- 568 57. Ferrera I, Sanchez O. Insights into microbial diversity in wastewater treatment  
569 systems: How far have we come? *Biotechnol Adv* 2016; **34**: 790–802.
- 570 58. Mielke RE, Pace DL, Porter T, Southam G. A critical stage in the formation of  
571 acid mine drainage: Colonization of pyrite by *Acidithiobacillus ferrooxidans*  
572 under pH-neutral conditions. *Geobiology* 2003; **1**: 81–90.
- 573 59. Praharaj T, Fortin D. Seasonal variations of microbial sulfate and iron  
574 reduction in alkaline Pb–Zn mine tailings (Ontario, Canada). *Appl Geochem*  
575 2008; **23**: 3728–3740.
- 576 60. Constant P, Chowdhury SP, Hesse L, Conrad R. Co-localization of  
577 atmospheric H<sub>2</sub> oxidation activity and high affinity H<sub>2</sub>-oxidizing bacteria in non-  
578 axenic soil and sterile soil amended with *Streptomyces* sp. PCB7. *Soil Biol*  
579 *Biochem* 2011; **43**: 1888–1893.
- 580 61. Cordero PRF, Bayly K, Leung PM, Huang C, Islam ZF, Schittenhelm RB, et al.  
581 Atmospheric carbon monoxide oxidation is a widespread mechanism  
582 supporting microbial survival. *ISME J* 2019; **13**: 2868–2881.
- 583 62. Eichner MJ, Basu S, Gledhill M, de Beer D, Shaked Y. Hydrogen dynamics in  
584 *Trichodesmium* colonies and their potential role in mineral iron acquisition.  
585 *Front Microbiol* 2019; **10**: 1565.
- 586 63. Houchins JP, Burris RH. Comparative characterization of two distinct  
587 hydrogenases from *Anabaena* sp. strain 7120. *J Bacteriol* 1981; **146**: 215–221.
- 588 64. Greening C, Grinter R, Chiri E. Uncovering the metabolic strategies of the  
589 dormant microbial majority: towards integrative approaches. *MSystems* 2019;  
590 **4**: e00107-19.
- 591

## 592 Figures

593

594 **Figure 1. Expression of the group 2a [NiFe]-hydrogenase in three bacterial**  
595 **strains during growth and survival.** The normalised transcript copy number of the  
596 large subunit gene (*hucL*) are plotted for (a) *Gemmatimonas aurantiaca* (locus  
597 GAU\_0412), (b) *Acidithiobacillus ferrooxidans* (locus AFE\_0702), and (c) *Chloroflexus*  
598 *aggregans* (locus CAGG\_0471). Copy number was analysed by qRT-PCR in cultures  
599 harvested during exponential phase and stationary phase, in the presence of either  
600 ambient H<sub>2</sub> or 10% H<sub>2</sub>. Error bars show standard deviations of three biological  
601 replicates (averaged from two technical duplicates) per condition. Values denoted by  
602 different letters were determined to be statistically significant based on a one-way  
603 ANOVA with post-hoc Tukey's multiple comparison ( $p < 0.05$ ).

604

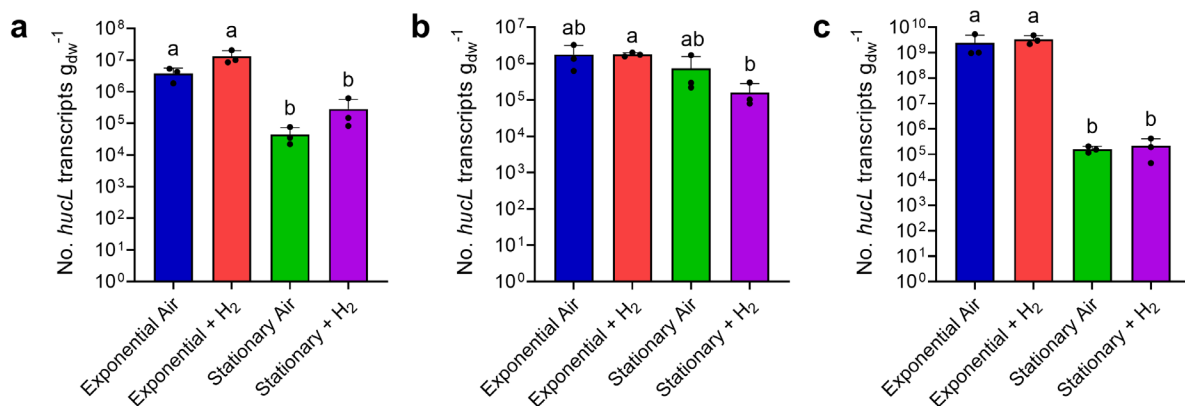

605

606

607 **Figure 2. Hydrogenase activity in three bacterial strains during growth and**  
 608 **survival.** H<sub>2</sub> oxidation by cultures of (a) *Gemmatimonas aurantiaca*, (b)  
 609 *Acidithiobacillus ferrooxidans*, and (c) *Chloroflexus aggregans*. Error bars show the  
 610 standard deviation of three biological replicates, with media-only vials monitored as  
 611 negative controls. Dotted lines show the atmospheric concentration of hydrogen (0.53  
 612 ppmv). (d) Biomass-normalised first-order rate constants based on H<sub>2</sub> oxidation  
 613 observed in exponential and stationary phase cultures. Error bars show standard  
 614 deviations of three biological replicates and statistical significance was tested using a  
 615 two-way ANOVA with post-hoc Tukey's multiple comparison (\*\* =  $p < 0.01$ ; \*\*\*\* =  $p <$   
 616  $0.0001$ ).  
 617

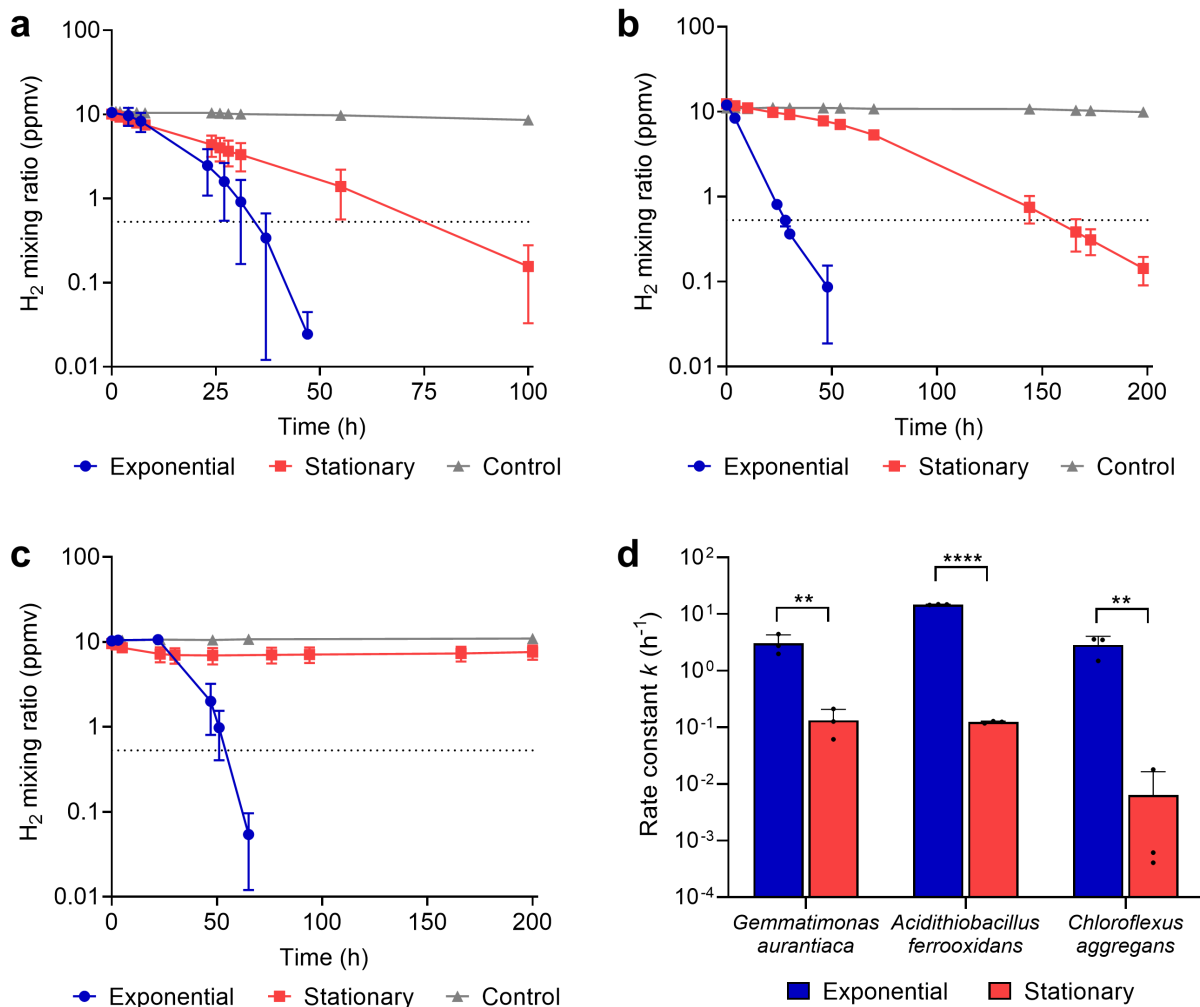

618

619 **Figure 3. Effects of H<sub>2</sub> supplementation on growth of three bacterial strains.** The  
620 final growth yield (OD<sub>600</sub>) of (a) *Gemmatimonas aurantiaca*, (b) *Acidithiobacillus*  
621 *ferrooxidans*, and (c) *Chloroflexus aggregans* is shown in ambient air vials containing  
622 H<sub>2</sub> at either ambient, 1%, or 10% concentrations. Error bars show the standard  
623 deviation of three biological replicates and statistical significance was tested using a  
624 one-way ANOVA with post-hoc Tukey's multiple comparison (\* =  $p < 0.05$ ; \*\* =  $p <$   
625  $0.01$ ; \*\*\* =  $p < 0.001$ ).

626

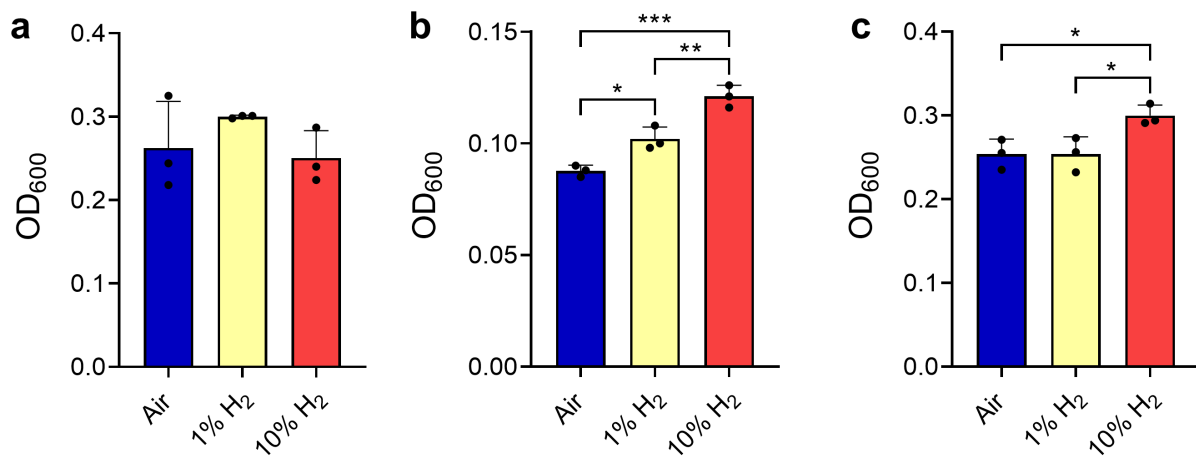

627

628

629 **Figure 4. Radial phylogenetic tree showing the distribution and evolutionary**  
630 **history of the group 2a [NiFe]-hydrogenase.** Amino acid sequences of the catalytic  
631 subunit of the group 2a [NiFe]-hydrogenase (*hucL*) are shown for 171 bacterial genera.  
632 The taxon names of the three study species, *G. aurantiaca*, *A. ferrooxidans*, and *C.*  
633 *aggregans*, are coloured in blue. The tree was constructed using the maximum-  
634 likelihood method (gaps treated with partial deletion), bootstrapped with 500  
635 replicates, and rooted at the mid-point.

636

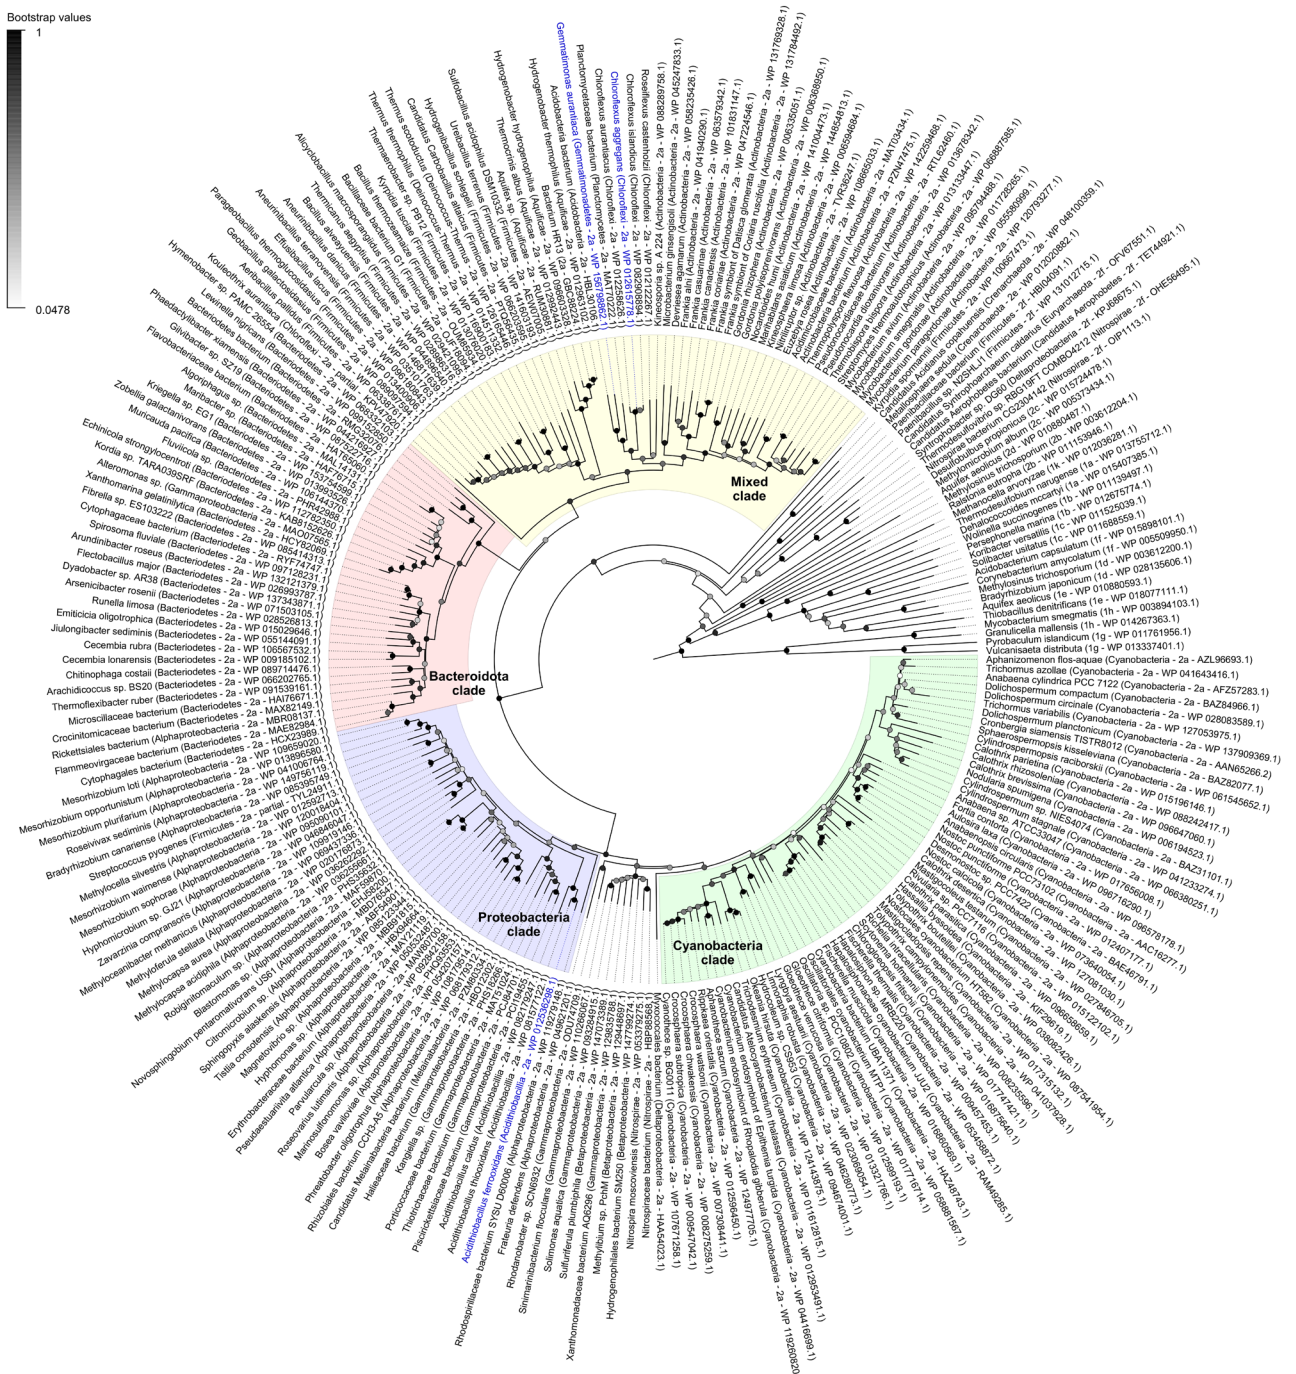

637
